# Supplementary material
Source: PubMed Central journal article supplement (PMC1266084)

**A****AaE74B**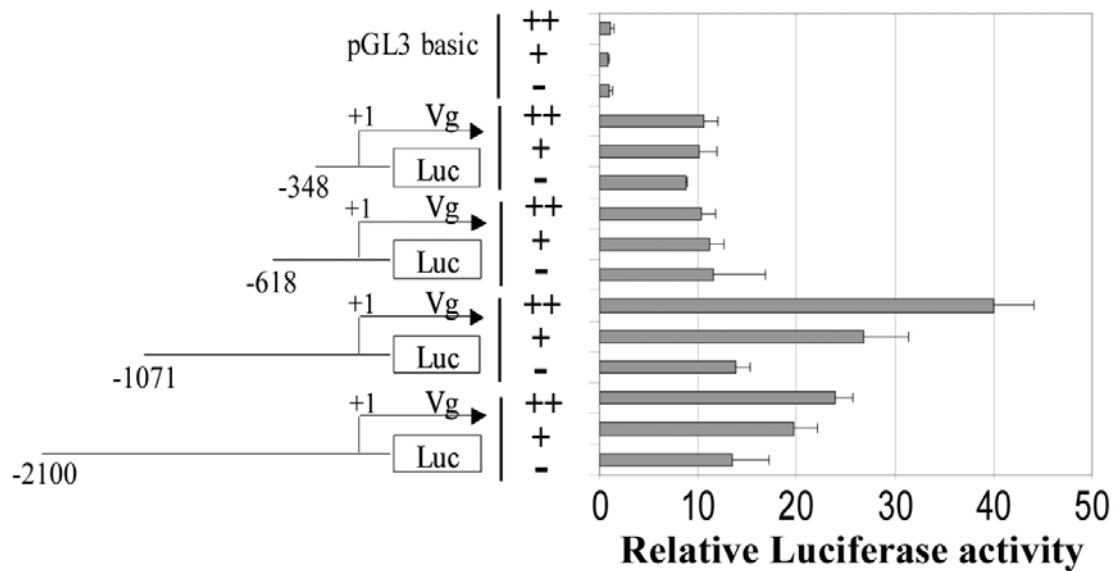**B**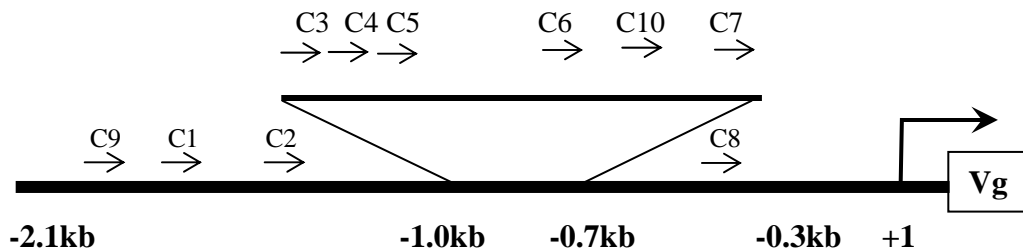**C**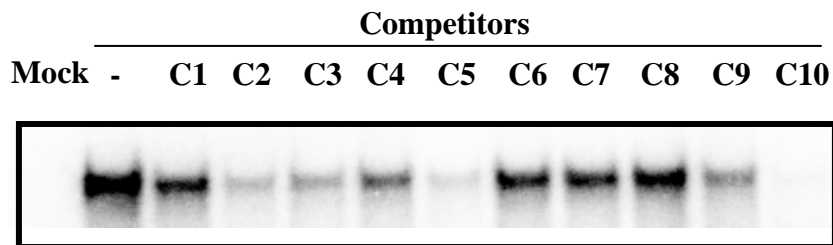

Supplement: pnas_0503501102_1.pdf [file pnas_0503501102_1.pdf]

**A**

**Reticulocyte lysate**

**AaE74B**

**AaE74B R734Q**

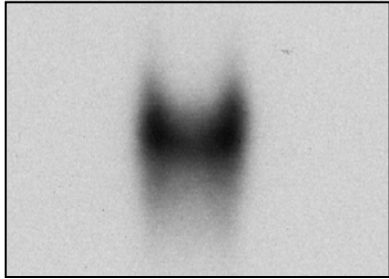

**B**

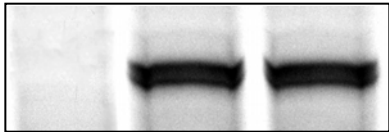

Supplement: pnas_0503501102_2.pdf [file pnas_0503501102_2.pdf]

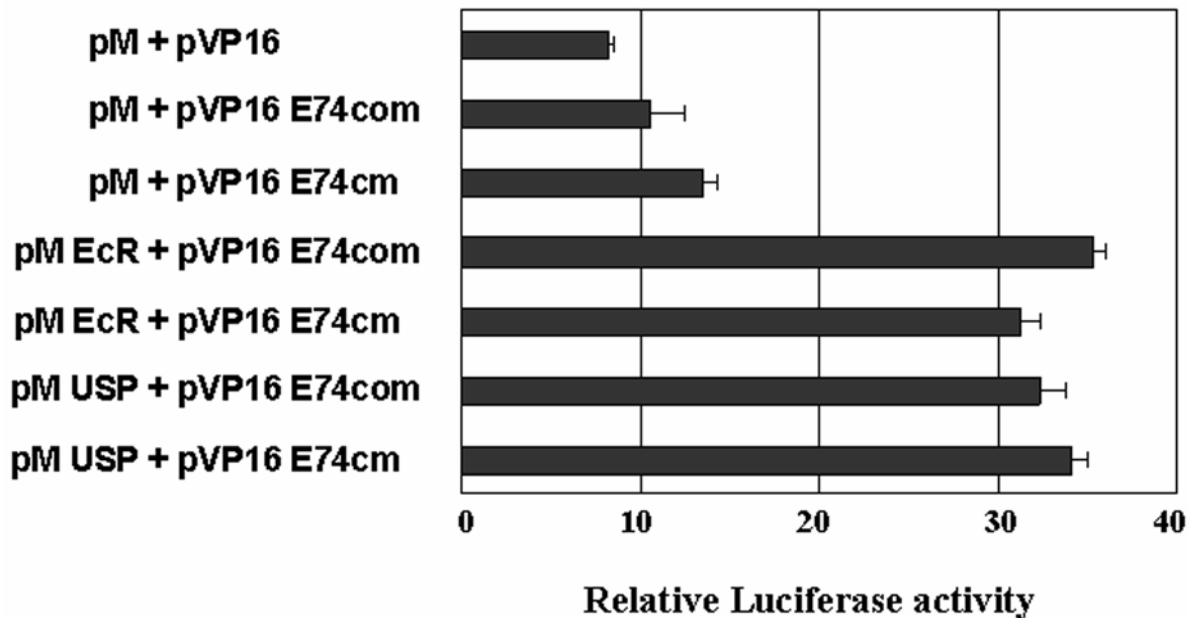

Supplement: pnas_0503501102_3.pdf [file pnas_0503501102_3.pdf]
